# Supplementary material
Source: Frontiers journal article supplement (https://www.frontiersin.org/articles/514888)

## SUPPLEMENTARY FIGURE 2

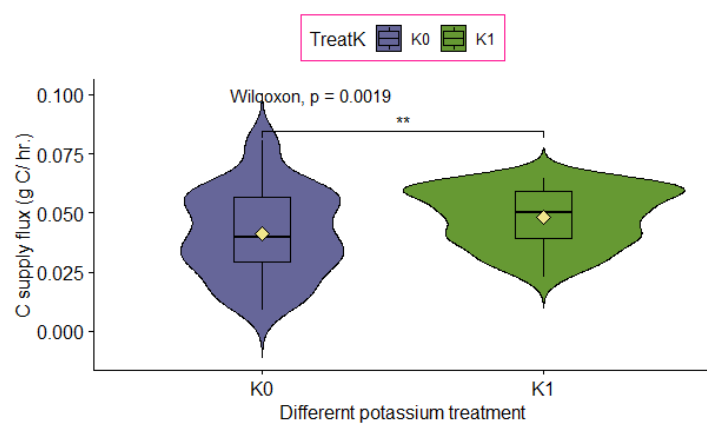

Supplement: Image_2.pdf [file Image_2.pdf]
